# Supplementary material
Source: ML conference proceedings conference paper supplement (https://openaccess.thecvf.com/content/CVPR2023/html/Li_Adjustment_and_Alignment_CVPR_2023_paper.html)
Supplement: Supplementary file 1 [file Li_Adjustment_and_Alignment_CVPR_2023_supplemental.pdf]

# Adjustment and Alignment for Unbiased Open Set Domain Adaptation (Supplementary Material)

Wuyang Li<sup>1</sup>    Jie Liu<sup>1</sup>    Bo Han<sup>2</sup>    Yixuan Yuan<sup>3,\*</sup>

<sup>1</sup>City University of Hong Kong    <sup>2</sup>Hong Kong Baptist University    <sup>3</sup>The Chinese University of Hong Kong

{wuyangli2, jliu.ee}-c@my.cityu.edu.hk    bhanml@comp.hkbu.edu.hk    yxyuan@ee.cuhk.edu.hk

In this supplementary material, we provide more theoretical and experimental justifications with four sections.

- Sec. **A**: causal explanation on the bias and its solutions;
- Sec. **B**: the theoretical proof of front-door adjustment and the deployed OSDA adjustment;
- Sec. **C**: more discussions and clarifications;
- Sec. **D**: sensitivity analysis on the proposed method.

## A. Justifying the Bias

### A.1. Formulating the Bias with Causality

As shown in Figure 1(a), the open-set context  $C$  is the confounder [6] that serves as the shared *cause* (head) in two causal links  $C \rightarrow X$  and  $C \rightarrow Y$  (highlighted in blue), leading to a biased observation  $P(Y|X)$ . This bias is caused by the confounding effect of  $C$  [6], and is well-proven in [6], and is theoretically grounded in various computer vision tasks [5, 8–12].

### A.2. Solving the Bias with Causality

To address the bias, we follow the causal theory [6] to deploy the *do*-calculus [6], which corrects the biased posterior  $P(Y|X)$  with  $P(Y|do(X))$ . Pearl and Mackenzie [6] have given two available solutions to implement the *do*-calculus from the theoretical perspective, *i.e.*, backdoor adjustment (Figure 1(b)) and front-door adjustment (Figure 1(c)).

**Backdoor Adjustment.** Existing works [9, 12] conduct backdoor adjustment [6] (see Figure 1(b)) for debiasing, which aims to cut the link  $C \rightarrow X$  to remove the confounding effect [6] of  $C$ . Specifically, as for the implementation, they [9, 12] decouple the context  $C$  into bias-related components  $C = \{C_1, C_2, \dots, C_n\}$  via dataset-level statistics and use them to guide model training. For example, with ground-truth labels, VC-RCNN [9] calculates class centers by averaging per-class samples as  $C_n$ , generating a context

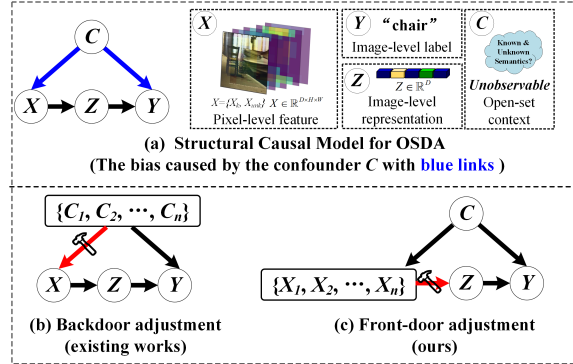

Figure 1. Illustration of (a) the proposed OSDA Structural Causal Model, (b) backdoor adjustment, and (c) front-door adjustment.

dictionary  $\in \mathbb{R}^{K \times D}$  ( $K$  is the class number and  $D$  is the channel dimension.). Then, they use the context dictionary to guide the learning of  $X$  through soft weighing, which introduces balanced class knowledge in each training sample. However, in OSDA, the non-available novel-class images and labels in the source domain lead to an **unobservable** open-set context, making it inevitable to deploy the backdoor adjustment [6] based debiasing strategy.

**Front-Door Adjustment.** This work breaks through this barrier by implementing the unexplored front-door adjustment, which allows the unobservable confounder [6], as shown in Figure 1(c). Instead of cutting the link  $C \rightarrow X$  through decoupling the context, the front-door adjustment cuts the link  $X \rightarrow Z$  to remove the confounding effect of  $C$  [6]. Hence, our crucial insight of deploying front-door adjustment lies in decoupling  $X = \{X_1, X_2, \dots, X_n\}$ , which is implemented as the decoupled base-class and novel-class regions  $X = \{X_b, X_n\}$  for unbiased OSDA.

## B. Theoretical Proofs

### B.1. Proof of the Front-Door Adjustment (Eq. 1 in the Main Paper)

Following [6], the proof of the original front-door adjustment considers two causal rules [6].

\*Corresponding author.

This work was supported by Hong Kong Research Grants Council (RGC) General Research Fund 11211221, and Innovation and Technology Commission-Innovation and Technology Fund ITS/100/20.

- **Causal Rule 2:**  $P(Y|do(X), Z) = P(Y|X, Z)$  if  $Z$  satisfies the back-door criterion
- **Causal Rule 3:**  $P(Y|do(X)) = P(Y)$  if there is no path from  $X$  to  $Y$  with only forward-directed arrows

Note that Rule 2 and Rule 3 have been proven satisfied in the proposed causal model [6]. Then, the proof consists of the following steps [6],

$$\begin{aligned}
& P(Y|do(X)) \\
&= \sum_Z P(Y|do(X), Z)P(Z|do(X)) \\
&\quad \text{(Probability Axioms)} \\
&= \sum_Z P(Y|do(X), do(Z))P(Z|do(X)) \\
&\quad \text{(Causal Rule 2)} \\
&= \sum_Z P(Y|do(X), do(Z))P(Z|X) \\
&\quad \text{(Causal Rule 2)} \\
&= \sum_Z P(Y|do(Z))P(Z|X) \\
&\quad \text{(Causal Rule 3)} \\
&= \sum_{X' \subseteq X} \sum_Z P(Y|do(Z), X')P(X'|do(Z))P(Z|X) \\
&\quad \text{(Probability Axioms)} \\
&= \sum_{X' \subseteq X} \sum_Z P(Y|Z, X')P(X'|do(Z))P(Z|X) \\
&\quad \text{(Causal Rule 2)} \\
&= \sum_{X' \subseteq X} \sum_Z P(Y|Z, X')P(X')P(Z|X), \\
&\quad \text{(Causal Rule 3)}
\end{aligned} \tag{1}$$

where  $X' \subseteq X$  indicates the decoupled components [6], which is formulated as  $X = \{X_b, X_n\}$  in this paper.

## B.2. Proof of the Deployed OSDA Adjustment (Eq. 3 in the Main Paper)

With the inherent and decoupled base-class and novel-class regions  $X = \{X_b, X_n\}$  in an image, we can open the summation symbol in Eq. 1 for unbiased OSDA, which is denoted as follows,

$$\begin{aligned}
P(Y|do(X)) &= P(Y|Z_b, X_b)P(X_b)P(Z_b|X) \\
&\quad + P(Y|Z_n, X_n)P(X_n)P(Z_n|X) \\
&\quad + P(Y|Z_n, X_b)P(X_b)P(Z_n|X) \\
&\quad + P(Y|Z_b, X_n)P(X_n)P(Z_b|X).
\end{aligned} \tag{2}$$

Since the global average pooling  $X \rightarrow Z$  doesn't change the semantic role of an image [3] in the deep-learning-based

image recognition, we have  $P(Z_b|X_b) = P(Z_n|X_n) = 1$  and  $P(Z_b|X_n) = P(Z_n|X_b) = 0$ , which can be used to justify some key items in Eq. 2. On the one hand, according to Total Probability Theorem, the conditional probability  $P(Z_{b/n}|X)$  can be rewritten as follows (we use blue and red color to highlight the zero and one value term),

$$\begin{aligned}
P(Z_b|X) &= P(Z_b|X_b)P(X_b|X) + P(Z_b|X_n)P(X_n|X) \\
&= P(X_b|X) \\
P(Z_n|X) &= P(Z_n|X_b)P(X_b|X) + P(Z_n|X_n)P(X_n|X) \\
&= P(X_n|X)
\end{aligned} \tag{3}$$

On the other hand, the joint probability  $P(Z_{b/n}, X_{b/n})$  can be rewritten with Bayes' Rule, denoted as follows,

$$\begin{aligned}
P(Z_b, X_b) &= P(Z_b|X_b)P(X_b) = P(X_b); \\
P(Z_n, X_n) &= P(Z_n|X_n)P(X_n) = P(X_n); \\
P(Z_b, X_n) &= P(Z_b|X_n)P(X_n) = 0; \\
P(Z_n, X_b) &= P(Z_n|X_b)P(X_b) = 0.
\end{aligned} \tag{4}$$

From the above analysis, we have the following explanation in terms of  $P(Y|Z_{b/n}, X_{b/n})$ . Firstly, optimizing  $P(Y|Z_b, X_b)$  and  $P(Y|X_b)$  are equivalent for the model learning since the conditioned events are equivalent:  $P(Z_b, X_b) = P(X_b)$ . This is also satisfied between  $P(Y|Z_n, X_n)$  and  $P(Y|X_n)$  with  $P(Z_n, X_n) = P(X_n)$ . Secondly, for the conditional probability  $P(Y|Z_b, X_n)$  and  $P(Y|Z_n, X_b)$ , we can observe that they are conditioned on an event of probability zero:  $P(Z_b, X_n) = P(Z_n, X_b) = 0$ , which can be approximated with a non-informative constant [2]. Thus, these two items don't contribute to making the class-level decision [2] for image recognition due to its non-discriminative property. Finally, after introducing Eq. 3 and Eq. 4 into Eq. 2, we have the simplified and deployable front-door adjustment to achieve an unbiased OSDA:

$$\begin{aligned}
P(Y|do(X)) &= P(Y|X_b)P(X_b)P(X_b|X) \\
&\quad + P(Y|X_n)P(X_n)P(X_n|X).
\end{aligned} \tag{5}$$

Hence, the key insight to correct the biased learning lies in considering both base-class and novel-class posterior  $P(Y|X_b)$  and  $P(Y|X_n)$ , which is achieved by the proposed Front-Door Adjustment loss  $\mathcal{L}_{FDA}$ .

## C. Discussion and Clarification

**Why ambiguous samples generate offsetting signals in the two heads of DCA.** For ambiguous (uncertain) samples, the signals of two heads of the proposed DCA module tend to be **comparable** due to balanced mask entries  $\mathbf{M}_b^i \approx \mathbf{M}_n^i$ . Note that two heads adapt samples to base and novel distribution **orthogonally and respectively**. Hence, the comparable intensity of the two heads tends to prevent incorrect adaptation to either distribution.

**Explanation on FDA (Eq.5) and DCA (Eq.7) in the main paper.** 1) **The relation between Eq.5/7.** Though both equations aim to discover base and novel regions  $X_{b/n}$ , Eq.5 requires image *labels* (see Eq.4) to discover labeled and unlabeled parts  $X_b = \{X_{lb}, X_{ub}\}$ . Differently, Eq.7 works in a *label-free* manner to find  $X_b$  and  $X_n$  in both domains, which cannot separate  $X_{lb}$  and  $X_{ub}$ . 2) **Why does DCA not consider unlabeled regions?** DCA generates base-class masks  $M_b^i$  (Eq.7) to align  $P(X_b) = P(X_{lb}, X_{ub})$ , which has considered labeled  $X_{lb}$  and unlabeled regions  $X_{ub}$ . Note that DCA does not need to separate  $X_{lb}$  and  $X_{ub}$ , since it aligns the whole base-class distribution  $P(X_b)$  instead of  $P(X_{lb/ub})$ .

**Strategy to prevent a risky selection in FDA.** We first follow Fig.4 to justify  $X_{lb/ub/n}$  in images, and then select  $X_n$  to generate the loss when there are more **recognized**  $X_{lb}$  than  $X_n$ . The reason is that very limited  $X_{lb}$  can be recognized in the early training stage, hence, most regions will be wrongly assumed as  $X_n$ . This strategy avoids wrongly assuming most samples as  $X_n$ , yielding a sub-optimal (risky) selection. Figure 4 of the main paper illustrates the basic idea of region selection instead of the whole learning procedure. With the model training, the number of  $X_{lb/ub}$  will increase, and  $X_n$  will decline due to more recognized  $X_{lb/ub}$ , which is shown in Table 1.

| Epoch              | 0     | 1     | 2     | 3     | 4     |
|--------------------|-------|-------|-------|-------|-------|
| $ X_{lb}  :  X_n $ | 0: 49 | 9: 32 | 17:22 | 17:16 | 16:14 |

Table 1. Statistics of the ratio between  $X_{lb}$  and  $X_n$

## D. Sensitivity Analysis

**Sensitivity on the feature resolution.** Considering that ANNA relies on fine-grained representation, we explore the effect on the block resolution (Table 2) by changing corresponding input image scales. With an increased feature resolution, more fine-grained visual blocks can be obtained in each image to remove the bias. Our method can improve further with the increase of feature resolution, *e.g.*, giving a better 77.8% HOS ( $9 \times 9$ ) compared with 76.8% HOS ( $7 \times 7$ ), showing its great potential in scene understanding.

| Resolution     | Ar→Rw       |             |             | Cl→Pr       |             |             |
|----------------|-------------|-------------|-------------|-------------|-------------|-------------|
|                | OS*         | UNK         | HOS         | OS*         | UNK         | HOS         |
| $7 \times 7$   | 74.1        | 79.7        | 76.8        | 64.2        | 73.6        | 68.6        |
| $8 \times 8$   | 76.9        | 77.7        | 77.3        | <b>64.7</b> | 76.0        | 69.9        |
| $9 \times 9$   | 76.4        | <b>79.9</b> | <b>77.8</b> | 63.4        | <b>78.6</b> | <b>70.1</b> |
| $10 \times 10$ | <b>80.1</b> | 74.1        | 77.0        | 64.2        | 76.9        | 70.0        |

Table 2. Analysis on the fine-grained visual block resolutions. A larger resolution indicates using more blocks for unbiased OSDA.

**Sensitivity on the multiple runs.** As shown in Table 3, we further report the experimental comparison with three runs as [1] on HOS (%) to evaluate the model robustness. It can be observed that the proposed method is able to achieve

the most robust performance with  $70.6 \pm 0.2$ , compared with the biased counterparts, *e.g.*, OSBP with  $64.9 \pm 0.5$ , due to satisfactory semantic perception with the debiasing effects. Moreover, our method also surpasses all the counterparts by a large margin in terms of the average performance among several runs, indicating the promising effects of the proposed theoretically grounded method.

| STA <sub>sum</sub> [4] | STA <sub>max</sub> [4] | OSBP [7]       | ROS [1]        | Anna (ours)    |
|------------------------|------------------------|----------------|----------------|----------------|
| $62.1 \pm 2.3$         | $61.0 \pm 0.5$         | $64.9 \pm 0.5$ | $66.5 \pm 0.3$ | $70.6 \pm 0.2$ |

Table 3. Comparison results with three runs on Office-Home.

## References

- [1] Silvia Bucci, Mohammad Reza Loghmani, and Tatiana Tommasi. On the effectiveness of image rotation for open set domain adaptation. In *ECCV*, pages 422–438. Springer, 2020. 3
- [2] William K Goosens. Alternative axiomatizations of elementary probability theory. *Notre Dame Journal of Formal Logic*, 20(1):227–239, 1979. 2
- [3] Kaiming He, Xiangyu Zhang, Shaoqing Ren, and Jian Sun. Deep residual learning for image recognition. In *CVPR*, pages 770–778, 2016. 2
- [4] Hong Liu, Zhangjie Cao, Mingsheng Long, Jianmin Wang, and Qiang Yang. Separate to adapt: Open set domain adaptation via progressive separation. In *CVPR*, pages 2927–2936, 2019. 3
- [5] Yulei Niu, Kaihua Tang, Hanwang Zhang, Zhiwu Lu, Xian-Sheng Hua, and Ji-Rong Wen. Counterfactual vqa: A cause-effect look at language bias. In *CVPR*, pages 12700–12710, 2021. 1
- [6] Judea Pearl and Dana Mackenzie. *The book of why: the new science of cause and effect*. Basic books, 2018. 1, 2
- [7] Kuniaki Saito, Shohei Yamamoto, Yoshitaka Ushiku, and Tatsuya Harada. Open set domain adaptation by backpropagation. In *ECCV*, pages 153–168, 2018. 3
- [8] Kaihua Tang, Jianqiang Huang, and Hanwang Zhang. Long-tailed classification by keeping the good and removing the bad momentum causal effect. In *NeurIPS*, 2020. 1
- [9] Tan Wang, Jianqiang Huang, Hanwang Zhang, and Qianru Sun. Visual commonsense r-cnn. In *CVPR*, pages 10760–10770, 2020. 1
- [10] Yingxin Wu, Xiang Wang, An Zhang, Xiangnan He, and Tat-Seng Chua. Discovering invariant rationales for graph neural networks. In *ICLR*, 2022. 1
- [11] Zhongqi Yue, Hanwang Zhang, Qianru Sun, and Xian-Sheng Hua. Interventional few-shot learning. *NeurIPS*, 2020. 1
- [12] Dong Zhang, Hanwang Zhang, Jinhui Tang, Xian-Sheng Hua, and Qianru Sun. Causal intervention for weakly-supervised semantic segmentation. *NeurIPS*, 33, 2020. 1
